# Supplementary material for: Facile synthesis of monodispersed yolk-shelled molybdenum disulfide microspheres with enhanced photocatalytic properties
Source: Royal Society of Chemistry journal article supplement (doi:10.1039/c8qi00878g), 2018-01-01
Supplement: c8qi00878g1.pdf [file c8qi00878g1.pdf]

Electronic Supplementary Information (ESI) for “***Facile Synthesis of Monodispersed  
Yolk-Shelled Molybdenum Disulfide Microspheres with Enhanced Photocatalytic  
Properties***”

Yongxing Zhang<sup>1\*</sup>, Yuanyuan Zhao<sup>1</sup>, Jia Li<sup>1</sup>, Li Li<sup>1</sup>, Yi Liu<sup>1</sup>, Bing Li<sup>1</sup>, Dechuan Li<sup>1</sup> and Xuanhua  
Li<sup>2\*</sup>

<sup>1</sup> Department of Materials Science and Engineering, Huaibei Normal University, Huaibei 235000, P.  
R. China

<sup>2</sup> State Key Laboratory of Solidification Processing Center of Nano Energy Materials, School of  
Materials Science and Engineering, Northwestern Polytechnical University Xi'an 710072, P. R.  
China

E-mail: zyx07157@mail.ustc.edu.cn; E-mail: [lixh32@nwpu.edu.cn](mailto:lixh32@nwpu.edu.cn)

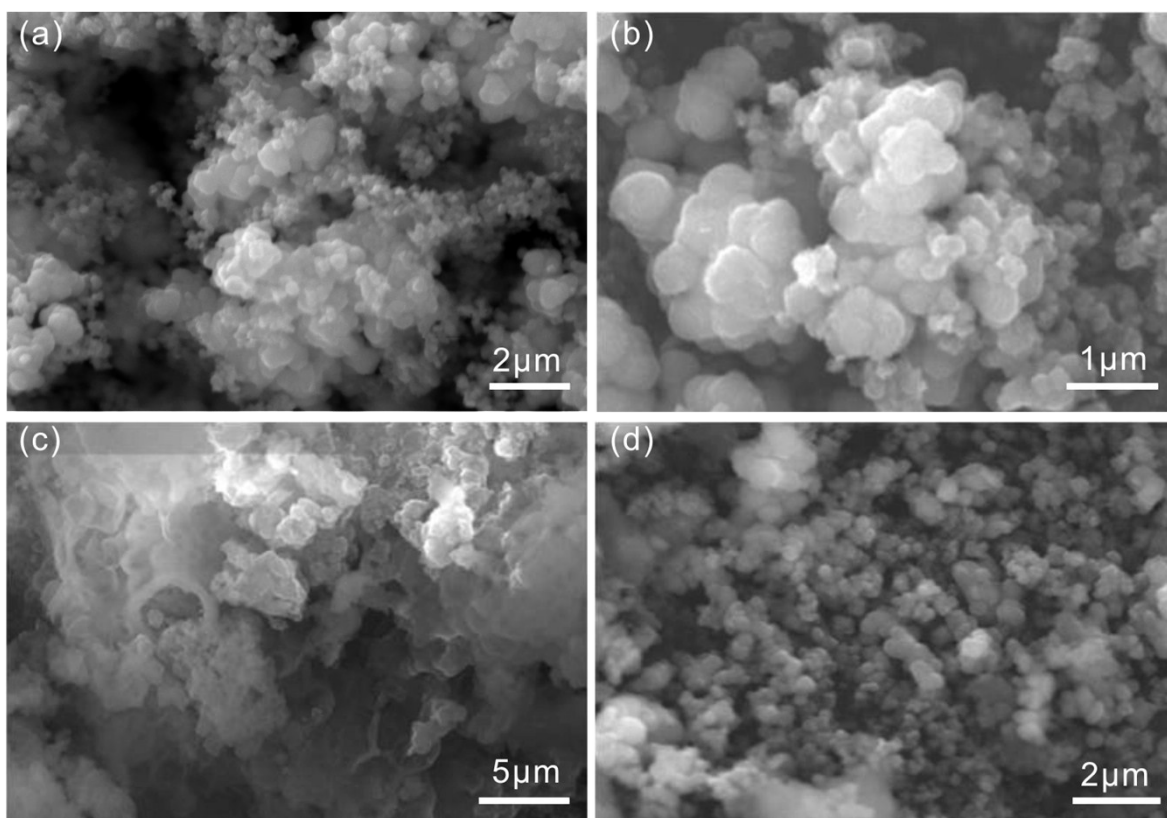

**Fig. S1.** SEM images of the products obtained at different surfactants: (a) without the addition of surfactant, (b) PEG, (c) CTAB, (d) STAB.

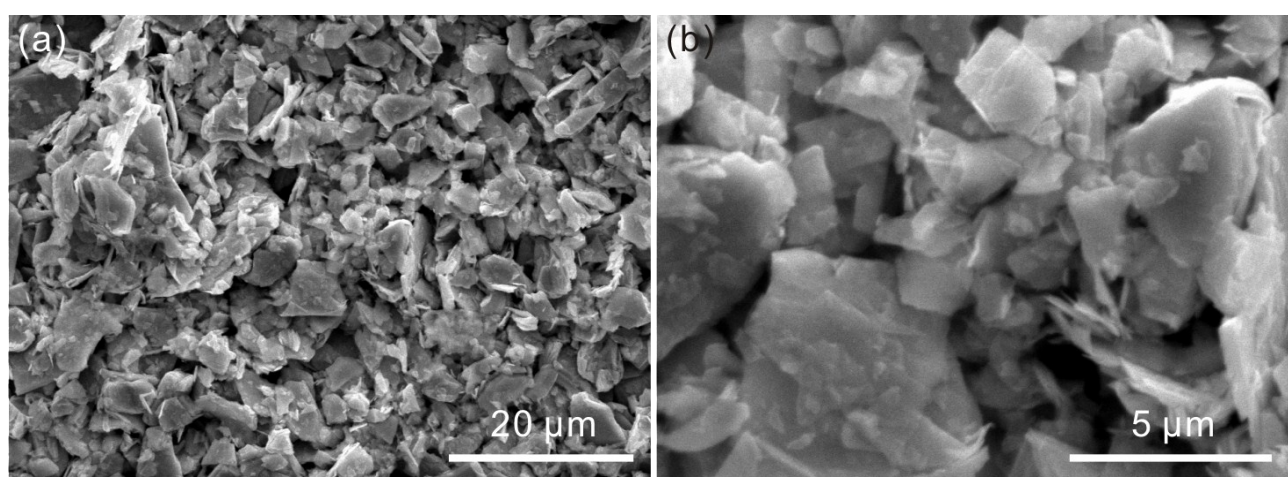

**Fig. S2** (a) low-resolution and (b) high-resolution SEM images of commercial MoS<sub>2</sub>.
